# Supplementary material for: Electron paramagnetic resonance and photoluminescence study on local structure of Gd 3+ ions in Gd-doped CaF 2 crystals
Source: Royal Society of Chemistry journal article supplement (doi:10.1039/d4ra08622h), 2025-01-01
Supplement: d4ra08622h1.pdf [file d4ra08622h1.pdf]

## Supplementary Information

### **Electron paramagnetic resonance and photoluminescence study on local structure of Gd<sup>3+</sup> ions in Gd:CaF<sub>2</sub> crystals.**

Shirui Luo *et al.*

*Corresponding author:* Liangbi Su, [suliangbi@mail.sic.ac.cn](mailto:suliangbi@mail.sic.ac.cn);

Wei Hong, [jminhong@126.com](mailto:jminhong@126.com);

## Fitting Code

```
%fitting code for NCF
clear,clf;
clc
B = 9.27400899e-21;    %Bohr magneton J*G^-1
h = 6.62606876;      %Planck's constant
%% *****
% This part generates the matrix for the spin operators.
S = 7/2;              %electron spin number
I = 0;                %nuclear spin number
dim = 2*S+1;          %size of the Hamiltonian matrix
for s1 = 0:(2*S)
for i1 = 1:(1+2*I)
for s2 = 0:(2*S)
for i2 = 1:(1+2*I)
    S1 = -(s1 - S); I1 = -(i1 - (I + 1));
    S2 = -(s2 - S); I2 = -(i2 - (I + 1));

    a = i2 + (s2*(2*I+1));    b = i1 + (s1*(2*I+1));

    if (I1 == I2) & (S2 == S1 + 1)
        Sp(a,b) = sqrt(S*(S+1) - S1*(S1+1));
    else
        Sp(a,b) = 0;
    end

    if (I1 == I2) & (S2 == S1 - 1)
        Sm(a,b) = sqrt(S*(S+1) - S1*(S1-1));
    else
        Sm(a,b) = 0;
    end

    if (I1 == I2) & (S2 == S1)
        Sz(a,b) = S1;
    else
        Sz(a,b) = 0;
    end

end
end
end
end
end
```

```

Sx = (Sp + Sm)/2 ;
Sy = i*(Sp - Sm)/2;
Sz;
%%% *****

% initial input for the spin Hamiltonian parameters
g = 1.99; % principle values of g;

n1 = 6; % angle between the cutting surface and the actual crystal face;
n2 = 0; %bc
n3 = -2; %ac
m1 = -1; %ab
m2 = 5;
m3 = 1;

B4 = -2.31; % principle values of B4, B6;
B6 = -0.0004;

S = eye(8)*(7/2); % spin vectors;

%%% *****

p = [g B4 n1 n2 n3 m1 m2 m3 B6]; % cubic
% p = [g B2_0 B4_0 B4 B6_0 B6]; % tetragonal
% p = [g B2_0 B4_0 B4 B6_0 B6 B6_3]; % T

%%% define data in ab, bc and ca planes, respectively: Experimental
data*****

%%% ab plane
ab1l_w=[2611 2716 3029 3442 3745 3777 0 3101 2744 2574];
ab2l_s=[2975 3033 3226 3500 3716 3740 0 3274 3050 2955];
ab3l_w=[3092 3163 3351 3545 3658 3668 0 3387 3182 3067];
ab4c_s=[3552 3568 3593 3576 3529 3521 3550 3590 3571 3546];
ab3r_w=[4031 3979 3810 0 3420 3402 0 3769 3964 4049];
ab2r_s=[4109 4030 3810 0 3443 3431 0 3769 4009 4137];
ab1r_w=[4498 4364 3982 0 3273 3247 3481 3902 4329 4544];

%%% bc plane
bc1l_w=[2550 2706 3063 3481 3745 3725 3427 3027 2711 2608];
bc2l_s=[2932 3022 3245 0 3716 3699 3487 3218 3024 2965];
bc3l_w=[3041 3151 3358 0 3644 3638 0 3342 3155 3084];
bc4c_s=[3528 3552 3571 3543 3502 3508 3557 3576 3553 3537];
bc3r_w=[4039 3958 0 0 3392 3405 0 0 3955 4008];
bc2r_s=[4130 4008 3767 0 3425 3431 0 3785 4003 4083];
bc1r_w=[4543 4338 3910 0 3244 3261 0 3948 4331 4464];

```

```
%% ac plane
```

```
ac1l_w=[2551 2633 2939 3349 3674 3738 3498 3090 2727 2553];  
ac2l_s=[2932 2979 3166 3441 3674 3716 0 3264 3035 2933];  
ac3l_w=[3042 3102 3290 3491 3616 3636 0 3371 3165 3043];  
ac4c_s=[3528 3541 3568 3553 3505 3493 3539 3569 3554 3528];  
ac3r_w=[4038 3995 3836 3610 3428 3394 0 3753 3947 4038];  
ac2r_s=[4129 4064 3846 3610 3463 3439 0 3753 3994 4129];  
ac1r_w=[4542 4433 4050 3610 3306 3255 3468 3881 4312 4541];
```

```
H =
```

```
[ab1l_w,ab2l_s,ab3l_w,ab4c_s,ab3r_w,ab2r_s,ab1r_w,ac1l_w,ac2l_s,ac3l_w,ac4c_s,ac3r_w,ac2r_s,ac1  
r_w,bc1l_w,bc2l_s,bc3l_w,bc4c_s,bc3r_w,bc2r_s,bc1r_w];
```

```
length(H)
```

```
%Euler angles of ba, ca, cb plane
```

```
a_ba = [0 0 0 0 0 0 0 0 0 0]+n1;  
a_cb = [0 10 20 30 40 50 60 70 80 90]+n2;  
a_ca = [0 10 20 30 40 50 60 70 80 90]+n3;  
alpha1 = [a_ba a_ba a_ba a_ba a_ba a_ba a_ba a_ba a_ca a_ca a_ca a_ca a_ca a_ca a_ca a_cb a_cb a_cb  
a_cb a_cb a_cb a_cb];  
  
b_ba = [0 10 20 30 40 50 60 70 80 90]+m1;  
b_cb = [0 0 0 0 0 0 0 0 0 0]+m2;  
b_ca = [0 0 0 0 0 0 0 0 0 0]+m3;  
beta1 = [b_ba b_ba b_ba b_ba b_ba b_ba b_ba b_ba b_ca b_ca b_ca b_ca b_ca b_ca b_ca b_cb b_cb b_cb  
b_cb b_cb b_cb b_cb];
```

```
%%%%;
```

```
s1_1=1*ones(1,length(ab1l_w));  
s1_2=1*ones(1,length(ab2l_s));  
s1_3=1*ones(1,length(ab3l_w));  
s1_4=1*ones(1,length(ab4c_s));  
s1_5=1*ones(1,length(ab3r_w));  
s1_6=1*ones(1,length(ab2r_s));  
s1_7=1*ones(1,length(ab1r_w));
```

```
s2_1=1*ones(1,length(ac1l_w));  
s2_2=1*ones(1,length(ac2l_s));  
s2_3=1*ones(1,length(ac3l_w));  
s2_4=1*ones(1,length(ac4c_s));
```

```

s2_5=1*ones(1,length(ac3r_w));
s2_6=1*ones(1,length(ac2r_s));
s2_7=1*ones(1,length(ac1r_w));

s3_1=1*ones(1,length(bc1l_w));
s3_2=1*ones(1,length(bc2l_s));
s3_3=1*ones(1,length(bc3l_w));
s3_4=1*ones(1,length(bc4c_s));
s3_5=1*ones(1,length(bc3r_w));
s3_6=1*ones(1,length(bc2r_s));
s3_7=1*ones(1,length(bc1r_w));

site1 = [s1_1 s1_2 s1_3 s1_4 s1_5 s1_6 s1_7];
site2 = [s2_1 s2_2 s2_3 s2_4 s2_5 s2_6 s2_7];
site3 = [s3_1 s3_2 s3_3 s3_4 s3_5 s3_6 s3_7];

site = [site1 site2 site3] ;
freqq1 = 1000*9.8646*ones(1,length(site1)); %in Mhz ab
freqq2 = 1000*9.8619*ones(1,length(site2)); %in Mhz ac
freqq3 = 1000*9.8603*ones(1,length(site2)); %in Mhz bc
freqq = [freqq1 freqq2 freqq3];

alpha = alpha1*pi/180;
beta = beta1*pi/180;
points = length(H);
sitenum=length(site);
alphanumber=length(alpha);
betanumber=length(beta);
freqqnumber=length(freqq);

dddd=0;
%%
for k = 1:points
    if H(k)> 1
        dddd=dddd+1;
    end
end
dddd % The total effective experimental data
%*****This begins the least squares analysis portion of the program*****

scale = 10;
new_sum = 1000000000;
while scale > 0.00001
    diff = 2;

```

```

scale = scale/10;
while diff > 0.00001    %*****program loops until parameters stop changing

for k= 1:9    %*****loops through the parameters
    if (k==9)
        old_sum = new_sum;
    end
    if k < 9
        delta = 0.001*scale;
    else
        delta = 0.00001*scale;
    end

    sum1 = sum_NCF_2(site, alpha, B, p, H, freqq, beta, points, Sm, Sp, Sx,Sy,Sz,B4,B6);
    p(k) = p(k) + delta;
    sum2 = sum_NCF_2(site, alpha, B, p, H, freqq, beta, points, Sm, Sp, Sx,Sy,Sz,B4,B6);
    p(k) = p(k) - 2*delta;
    sum3 = sum_NCF_2(site, alpha, B, p, H, freqq, beta, points, Sm, Sp, Sx,Sy,Sz,B4,B6);

    if (sum1 < sum2) & (sum1 < sum3)
        p(k) = p(k) + delta;
        sum = sum1;
    elseif (sum2 < sum1) & (sum2 < sum3)
        p(k) = p(k) + 2*delta;
        sum = sum2;
    else
        sum = sum3;
    end

    if (k==9)
        new_sum = sum;
        old_sum;
        diff = abs(old_sum - new_sum);
    end
end
dev = (sqrt(sum/210))/2.8;    %*****gives standard deviation in Gauss

pp=p;

pp;
scale
dev
end

```

end

pp

**% Subroutine for EPR angular dependence fitting of center in NCF**

**function** sum = sum\_NCF\_2(site, alpha, B, p, H, freqq, beta, points, Sm, Sp, Sx,Sy,Sz,B4,B6)

sum = 0;

S = 7/2;

T\_G = eye(3); **% no theta, phi, psi**

**for** k=1:210 **% all experimental data**

**if** H(k)==0000.00 **%**

**else**

RM = [cos(alpha(k)) -sin(alpha(k))\*sin(beta(k)) sin(alpha(k))\*cos(beta(k)); 0 cos(beta(k))  
sin(beta(k)); -sin(alpha(k)) -cos(alpha(k))\*sin(beta(k)) cos(alpha(k))\*cos(beta(k))];

**%% Magnetic magnetically inequivalent points**

**if** site(k) == 1

Mod = [1 0 0; 0 1 0; 0 0 1];

**end**

**if** site(k) == 2

Mod = [1 0 0; 0 -1 0; 0 0 -1];

**end**

**if** site(k) == 3

Mod = [-1 0 0; 0 1 0; 0 0 -1];

**end**

**if** site(k) == 4

Mod = [-1 0 0; 0 -1 0; 0 0 1];

**end**

**if** site(k) == 5

Mod = [0 1 0; 0 0 1; 1 0 0];

**end**

**if** site(k) == 6

Mod = [0 1 0; 0 0 -1 ; -1 0 0];

**end**

**if** site(k) == 7

Mod = [0 -1 0; 0 0 -1 ; -1 0 0];

**end**

**if** site(k) == 8

Mod = [0 -1 0; 0 0 -1; 1 0 0];

**end**

**if** site(k) == 9

Mod = [0 0 1; 1 0 0; 0 1 0];

**end**

```
if site(k) == 10
    Mod = [0 0 1; -1 0 0; 0 -1 0];
end
if site(k) == 11
    Mod = [0 0 -1; 1 0 0; 0 -1 0];
end
if site(k) == 12
    Mod = [0 0 -1; -1 0 0; 0 1 0];
end
if site(k) == 13
    Mod = [0 -1 0; -1 0 0; 0 0 -1];
end
if site(k) == 14
    Mod = [0 -1 0; 1 0 0; 0 0 1];
end
if site(k) == 15
    Mod = [0 1 0; -1 0 0; 0 0 1];
end
if site(k) == 16
    Mod = [0 1 0; 1 0 0; 0 0 -1];
end
if site(k) == 17
    Mod = [-1 0 0; 0 0 -1; 0 -1 0];
end
if site(k) == 18
    Mod = [-1 0 0; 0 0 1; 0 1 0];
end
if site(k) == 19
    Mod = [1 0 0; 0 0 -1; 0 1 0];
end
if site(k) == 20
    Mod = [1 0 0; 0 0 1; 0 -1 0];
end
if site(k) == 21
    Mod = [0 0 -1; 0 -1 0; -1 0 0];
end
if site(k) == 22
    Mod = [0 0 -1; 0 1 0; 1 0 0];
end
if site(k) == 23
    Mod = [0 0 1; 0 -1 0; 1 0 0];
end
if site(k) == 24
    Mod = [0 0 1; 0 1 0; -1 0 0];
```



```

end

g=[p(1) 0 0 ; 0 p(1) 0 ; 0 0 p(1)];
gg=T_G'*g*T_G;
S = eye(8)*(7/2);

RM=Mod*RM;
mag=[0 0 H(k)] ;
mag=(RM*(mag'))';

%% Stevens operators
O4_0 = 35*Sz^4-30*S*(S+eye(8))*Sz^2+25*Sz^2-6*S*(S+eye(8))+3*S^2*(S+eye(8))^2;
O4_4 = 0.5*(Sp^4+Sm^4);
O6_0 = 231*Sz^6-315*S*(S+eye(8))*Sz^4+735*Sz^4+105*S^2*(S+eye(8))^2*Sz^2-
525*S*(S+eye(8))*Sz^2+294*Sz^2-5*S^3*(S+eye(8))^3+40*S^2*(S+eye(8))^2-60*S*(S+eye(8));
O6_4 = 0.25*((11*Sz^2-S*(S+eye(8))-eye(8)*38)*(Sp^4+Sm^4)+(Sp^4+Sm^4)*(11*Sz^2-
S*(S+eye(8))-eye(8)*38));

H_EZ = 1000*B*(
Sx*(gg(1,1)*mag(1)+gg(1,2)*mag(2)+gg(1,3)*mag(3))+Sy*(gg(2,1)*mag(1)+gg(2,2)*mag(2)+gg(2,3)
*mag(3))+Sz*(gg(3,1)*mag(1)+gg(3,2)*mag(2)+gg(3,3)*mag(3))/(6.62e-18); %/ Electron_Zeeman
term UNit is Mhz

H_ZFS = B4*(O4_0+5*O4_4) + B6*(O6_0-21*O6_4); % cubic
Hamiltonian=H_EZ+H_ZFS;
level=sort(real(eig(Hamiltonian)));

if k<11
    freq(k)=abs(level(2)-level(1));
elseif k<21
    freq(k)=abs(level(6)-level(5));
elseif k<31
    freq(k)=abs(level(7)-level(6));
elseif k<41
    freq(k)=abs(level(5)-level(4));
elseif k<51
    freq(k)=abs(level(3)-level(2));
elseif k<61
    freq(k)=abs(level(4)-level(3));
elseif k<71
    freq(k)=abs(level(8)-level(7)); %ba

elseif k<81

```

```

freq(k)=abs(level(2)-level(1));
elseif k<91
freq(k)=abs(level(6)-level(5));
elseif k<101
freq(k)=abs(level(7)-level(6));
elseif k<111
freq(k)=abs(level(5)-level(4));
elseif k<121
freq(k)=abs(level(3)-level(2));
elseif k<131
freq(k)=abs(level(4)-level(3));
elseif k<141
freq(k)=abs(level(8)-level(7)); %ca

elseif k<151
freq(k)=abs(level(2)-level(1));
elseif k<161
freq(k)=abs(level(6)-level(5));
elseif k<171
freq(k)=abs(level(7)-level(6));
elseif k<181
freq(k)=abs(level(5)-level(4));
elseif k<191
freq(k)=abs(level(3)-level(2));
elseif k<201
freq(k)=abs(level(4)-level(3));
else
freq(k)=abs(level(8)-level(7)); %cb
end

deltaf(k) = (freq(k)-freqq(k))^2;
sum = sum + deltax(k);
deltaff(k)=(freq(k)-freqq(k))/freqq(k);

end
end

```

```

%fitting code for IGCF
clear,clf;
clc
B = 9.27400899e-21; %Bohr magneton J*G^-1
h = 6.62606876; %Planck's constant
%% *****
% This part generates the matrix for the spin operators.
S = 7/2; %electron spin number
I = 0; %nuclear spin number
dim = 2*S+1; %size of the Hamiltonian matrix
for s1 = 0:(2*S)
for i1 = 1:(1+2*I)
for s2 = 0:(2*S)
for i2 = 1:(1+2*I)
    S1 = -(s1 - S); I1 = -(i1 - (I + 1));
    S2 = -(s2 - S); I2 = -(i2 - (I + 1));

    a = i2 + (s2*(2*I+1)); b = i1 + (s1*(2*I+1));

    if (I1 == I2) & (S2 == S1 + 1)
        Sp(a,b) = sqrt(S*(S+1) - S1*(S1+1));
    else
        Sp(a,b) = 0;
    end

    if (I1 == I2) & (S2 == S1 - 1)
        Sm(a,b) = sqrt(S*(S+1) - S1*(S1-1));
    else
        Sm(a,b) = 0;
    end

    if (I1 == I2) & (S2 == S1)
        Sz(a,b) = S1;
    else
        Sz(a,b) = 0;
    end

end
end
end
end

```

$$S_x = (S_p + S_m)/2 \quad ;$$

```

Sy = i*(Sp - Sm)/2;
Sz;
%%% *****
% initial input for the spin Hamiltonian parameters
g = 1.99; % principle values of g;
n1 = 0; % angle between the cutting surface and the actual crystal face;
n2 = 4;
n3 = 0;
m1 = 3;
m2 = 0;
m3 = 1;

% principle values of zero-field splitting parameters ;
B4 = -2.3;
B6 = 0.001;
S = eye(8)*(7/2); % spin vectors;

%%% *****
p = [g B4 n1 n2 n3 m1 m2 m3 B6]; % cubic
%%% define data in ab, bc and ca planes, respectively: Experimental
data*****

%%% ab plane
ab1l_w=[2577 2777 3152 0 0 0 3300 2893 2613 2567];
ab2l_s=[2950 3066 3307 3576 3730 3654 3410 3139 2970 2944];
ab3l_w=[3063 3199 3405 0 3644 3614 3472 3267 3088 3055];
ab4c_s=[3536 3563 3571 0 3494 3514 3561 3570 3541 3533];
ab3r_w=[4031 3936 3721 3527 3438 3478 3640 0 4012 4035];
ab2r_s=[4114 3963 3721 0 3393 3452 3640 3875 4086 4121];
ab1r_w=[4516 4258 3820 3430 3249 3337 0 4113 4467 4528];

%%% ac plane
ac1l_w=[2587 2801 3179 0 0 0 3273 2862 2601 2571];
ac2l_s=[2955 3080 3324 3589 3732 3635 3390 3120 2963 2945];
ac3l_w=[3070 3213 3417 0 3645 3610 3459 3250 3080 3058];
ac4c_s=[3536 3565 3571 0 3494 3517 3563 3568 3539 3534];
ac3r_w=[4023 3920 3705 3512 3433 3486 3654 3894 4017 4032];
ac2r_s=[4104 3943 3705 0 3389 0 3654 3894 4094 4118];
ac1r_w=[4500 4224 3791 3402 3243 3354 0 4149 4482 4523];

%%% bc plane
bc1l_w=[2549 2687 3029 3445 0 0 3427 3011 2684 2563];
bc2l_s=[2933 3012 3225 0 3707 3700 0 3214 3011 2941];

```

```
bc3l_w=[3041 3139 3340 0 3633 3631 0 3333 3138 3052];
bc4c_s=[3529 3551 3572 3549 3500 3502 3559 3573 3551 3532];
bc3r_w=[4043 3972 3791 0 3447 3449 0 3800 3977 4035];
bc2r_s=[4134 4026 3791 0 3410 3417 0 3800 4028 4123];
bc1r_w=[4551 4368 3954 0 3272 3279 0 3974 4371 4531];
```

H =

```
[ab1l_w,ab2l_s,ab3l_w,ab4c_s,ab3r_w,ab2r_s,ab1r_w,ac1l_w,ac2l_s,ac3l_w,ac4c_s,ac3r_w,ac2r_s,ac1r_w,bc1l_w,bc2l_s,bc3l_w,bc4c_s,bc3r_w,bc2r_s,bc1r_w];
```

length(H)

*%Euler angles of ba, ca, cb plane*

```
a_ba = [0 0 0 0 0 0 0 0 0 0]+n1;
a_ca = [0 10 20 30 40 50 60 70 80 90]+n2;
a_cb = [0 10 20 30 40 50 60 70 80 90]+n3;
alpha1 = [a_ba a_ba a_ba a_ba a_ba a_ba a_ba a_ba a_ca a_ca a_ca a_ca a_ca a_ca a_ca a_cb a_cb a_cb a_cb a_cb a_cb a_cb a_cb];

b_ba = [0 10 20 30 40 50 60 70 80 90]+m1;
b_ca = [0 0 0 0 0 0 0 0 0 0]+m2;
b_cb = [0 0 0 0 0 0 0 0 0 0]+m3;
beta1 = [b_ba b_ba b_ba b_ba b_ba b_ba b_ba b_ba b_ca b_ca b_ca b_ca b_ca b_ca b_ca b_cb b_cb b_cb b_cb b_cb b_cb b_cb b_cb];
```

*%%%%;*

```
s1_1=1*ones(1,length(ab1l_w));
s1_2=1*ones(1,length(ab2l_s));
s1_3=1*ones(1,length(ab3l_w));
s1_4=1*ones(1,length(ab4c_s));
s1_5=1*ones(1,length(ab3r_w));
s1_6=1*ones(1,length(ab2r_s));
s1_7=1*ones(1,length(ab1r_w));
```

```
s2_1=1*ones(1,length(ac1l_w));
s2_2=1*ones(1,length(ac2l_s));
s2_3=1*ones(1,length(ac3l_w));
s2_4=1*ones(1,length(ac4c_s));
s2_5=1*ones(1,length(ac3r_w));
s2_6=1*ones(1,length(ac2r_s));
s2_7=1*ones(1,length(ac1r_w));
```

```

s3_1=1*ones(1,length(bc1l_w));
s3_2=1*ones(1,length(bc2l_s));
s3_3=1*ones(1,length(bc3l_w));
s3_4=1*ones(1,length(bc4c_s));
s3_5=1*ones(1,length(bc3r_w));
s3_6=1*ones(1,length(bc2r_s));
s3_7=1*ones(1,length(bc1r_w));

site1 = [s1_1 s1_2 s1_3 s1_4 s1_5 s1_6 s1_7];
site2 = [s2_1 s2_2 s2_3 s2_4 s2_5 s2_6 s2_7];
site3 = [s3_1 s3_2 s3_3 s3_4 s3_5 s3_6 s3_7];

site = [site1 site2 site3] ;
%site = site1;

freqq_ab = [9.8712    9.8712    9.8711    9.8710    9.8708    9.8707    9.8705    9.8704
9.8702    9.8702];
freqq_ac = [9.8690    9.8691    9.8691    9.8692    9.8693    9.8693    9.8693    9.8693
9.8692    9.8691];
freqq_bc = [9.8676    9.8675    9.8674    9.8673    9.8673    9.8671    9.8672    9.8674
9.8675    9.8676];

freqq1 = 1000*[freqq_ab freqq_ab freqq_ab freqq_ab freqq_ab freqq_ab freqq_ab];
freqq2 = 1000*[freqq_ac freqq_ac freqq_ac freqq_ac freqq_ac freqq_ac freqq_ac];
freqq3 = 1000*[freqq_bc freqq_bc freqq_bc freqq_bc freqq_bc freqq_bc freqq_bc];
freqq = [freqq1 freqq2 freqq3];

alpha = alpha1*pi/180;
beta = beta1*pi/180;
points = length(H);
sitenumbr=length(site);
alphanumber=length(alpha);
betanumber=length(beta);
freqqnumber=length(freqq);

dddd=0;
%%
for k = 1:points
    dddd=dddd+1;
end
end
dddd % The total effective experimental data
%*****This begins the least squares analysis portion of the program*****

```

```

scale = 10;
new_sum = 1000000000;
while scale > 0.00001
    diff = 2;
    scale = scale/10;
    while diff > 0.00001    %*****program loops until parameters stop changing

        for k= 1:9    %*****loops through the parameters
            if (k==1)
                old_sum = new_sum;
            end
            if k < 9
                delta = 0.001*scale;
            else
                delta = 0.00001*scale;
            end

            sum1 = sum_GCF_3plane(site, alpha, B, p, H, freqq, beta, points, Sm, Sp,
Sx,Sy,Sz,B4,B6);
            p(k) = p(k) + delta;
            sum2 = sum_GCF_3plane(site, alpha, B, p, H, freqq, beta, points, Sm, Sp,
Sx,Sy,Sz,B4,B6);
            p(k) = p(k) - 2*delta;
            sum3 = sum_GCF_3plane(site, alpha, B, p, H, freqq, beta, points, Sm, Sp,
Sx,Sy,Sz,B4,B6);

            if (sum1 < sum2) & (sum1 < sum3)
                p(k) = p(k) + delta;
                sum = sum1;
            elseif (sum2 < sum1) & (sum2 < sum3)
                p(k) = p(k) + 2*delta;
                sum = sum2;
            else
                sum = sum3;
            end

            if (k==9)
                new_sum = sum;
                old_sum;
                diff = abs(old_sum - new_sum);
            end
        end
    end
end

```

```

    dev = (sqrt(sum/210))/2.8;    %****gives standard deviation in Gauss

    pp=p;
    pp;
    scale
    dev
end
end
pp

%Subroutine for EPR angular dependence fitting of center in 1GCF
function sum = sum_GCF_3plane(site, alpha, B, p, H, freqq, beta, points, Sm, Sp, Sx,Sy,Sz,B4,B6)

sum = 0;
S = 7/2;

    T_G = eye(3);    % no theta, phi, psi

for k=1:210    % all experimental data
    if H(k)==0000.00 %
        else
            RM = [cos(alpha(k)) -sin(alpha(k))*sin(beta(k)) sin(alpha(k))*cos(beta(k)); 0 cos(beta(k))
sin(beta(k)); -sin(alpha(k)) -cos(alpha(k))*sin(beta(k)) cos(alpha(k))*cos(beta(k))];

%% Magnetic magnetically inequivalent points
    if site(k) == 1
        Mod = [1 0 0; 0 1 0; 0 0 1];
    end
    if site(k) == 2
        Mod = [1 0 0; 0 -1 0; 0 0 -1];
    end
    if site(k) == 3
        Mod = [-1 0 0; 0 1 0; 0 0 -1];
    end
    if site(k) == 4
        Mod = [-1 0 0; 0 -1 0; 0 0 1];
    end
    if site(k) == 5
        Mod = [0 1 0; 0 0 1; 1 0 0];
    end
    if site(k) == 6
        Mod = [0 1 0; 0 0 -1 ; -1 0 0];
    end
    if site(k) == 7

```



```

    Mod = [0 -1 0;0 0 -1 ; -1 0 0];
end
if site(k) == 8
    Mod = [0 -1 0; 0 0 -1;1 0 0 ];
end
if site(k) == 9
    Mod = [0 0 1; 1 0 0;0 1 0 ];
end
if site(k) == 10
    Mod = [0 0 1; -1 0 0;0 -1 0 ];
end
if site(k) == 11
    Mod = [0 0 -1; 1 0 0;0 -1 0 ];
end
if site(k) == 12
    Mod = [0 0 -1; -1 0 0;0 1 0 ];
end
if site(k) == 13
    Mod = [0 -1 0; -1 0 0;0 0 -1 ];
end
if site(k) == 14
    Mod = [0 -1 0; 1 0 0;0 0 1 ];
end
if site(k) == 15
    Mod = [0 1 0; -1 0 0;0 0 1 ];
end
if site(k) == 16
    Mod = [0 1 0; 1 0 0;0 0 -1 ];
end
if site(k) == 17
    Mod = [-1 0 0; 0 0 -1;0 -1 0 ];
end
if site(k) == 18
    Mod = [-1 0 0; 0 0 1;0 1 0 ];
end
if site(k) == 19
    Mod = [1 0 0; 0 0 -1;0 1 0 ];
end
if site(k) == 20
    Mod = [1 0 0; 0 0 1;0 -1 0 ];
end
if site(k) == 21
    Mod = [0 0 -1; 0 -1 0;-1 0 0 ];
end

```

```

if site(k) == 22
    Mod = [0 0 -1; 0 1 0; 1 0 0];
end
if site(k) == 23
    Mod = [0 0 1; 0 -1 0; 1 0 0];
end
if site(k) == 24
    Mod = [0 0 1; 0 1 0; -1 0 0];
end

g=[p(1) 0 0 ; 0 p(1) 0 ; 0 0 p(1)];
gg=T_G'*g*T_G;
S = eye(8)*(7/2);

RM=Mod*RM;
mag=[0 0 H(k)];
mag=(RM*(mag'))';

%% Stevens operators
O4_0 = 35*Sz^4-30*S*(S+eye(8))*Sz^2+25*Sz^2-6*S*(S+eye(8))+3*S^2*(S+eye(8))^2;
O4_4 = 0.5*(Sp^4+Sm^4);
O6_0 = 231*Sz^6-315*S*(S+eye(8))*Sz^4+735*Sz^4+105*S^2*(S+eye(8))^2*Sz^2-
525*S*(S+eye(8))*Sz^2+294*Sz^2-5*S^3*(S+eye(8))^3+40*S^2*(S+eye(8))^2-60*S*(S+eye(8));
O6_4 = 0.25*((11*Sz^2-S*(S+eye(8))-eye(8)*38)*(Sp^4+Sm^4)+(Sp^4+Sm^4)*(11*Sz^2-
S*(S+eye(8))-eye(8)*38));

H_EZ = 1000*B*(
Sx*(gg(1,1)*mag(1)+gg(1,2)*mag(2)+gg(1,3)*mag(3))+Sy*(gg(2,1)*mag(1)+gg(2,2)*mag(2)+gg(2,3)
*mag(3))+Sz*(gg(3,1)*mag(1)+gg(3,2)*mag(2)+gg(3,3)*mag(3)))/(6.62e-18); %/Electron_Zeeman
term UNit is Mhz

H_ZFS = B4*(O4_0+5*O4_4) + B6*(O6_0-21*O6_4); % cubic

Hamiltonian=H_EZ+H_ZFS;
level=sort(real(eig(Hamiltonian)));

if k<11
    freq(k)=abs(level(2)-level(1));
elseif k<21
    freq(k)=abs(level(6)-level(5));
elseif k<31
    freq(k)=abs(level(7)-level(6));
elseif k<41

```

```

freq(k)=abs(level(5)-level(4));
elseif k<51
freq(k)=abs(level(3)-level(2));
elseif k<61
freq(k)=abs(level(4)-level(3));
elseif k<71
freq(k)=abs(level(8)-level(7)); %ba

elseif k<81
freq(k)=abs(level(2)-level(1));
elseif k<91
freq(k)=abs(level(6)-level(5));
elseif k<101
freq(k)=abs(level(7)-level(6));
elseif k<111
freq(k)=abs(level(5)-level(4));
elseif k<121
freq(k)=abs(level(3)-level(2));
elseif k<131
freq(k)=abs(level(4)-level(3));
elseif k<141
freq(k)=abs(level(8)-level(7)); %ca

elseif k<151
freq(k)=abs(level(2)-level(1));
elseif k<161
freq(k)=abs(level(6)-level(5));
elseif k<171
freq(k)=abs(level(7)-level(6));
elseif k<181
freq(k)=abs(level(5)-level(4));
elseif k<191
freq(k)=abs(level(3)-level(2));
elseif k<201
freq(k)=abs(level(4)-level(3));
else
freq(k)=abs(level(8)-level(7)); %cb
end

```

```

deltaf(k) = (freq(k)-freqq(k))^2;
sum = sum + deltax(k);
deltaff(k)=(freq(k)-freqq(k))/freqq(k);

```

end  
end

## Stevens Operators

The Stevens operators are used to express higher order spin-Hamiltonian terms. The fourth- and sixth-order Stevens operators used in this work are as follows:

$$O_4^0 = 35S_z^4 - \{30S(S+1) - 25\}S_z^2 - 6S(S+1) + 3S^2(S+1)^2$$

$$O_4^4 = \frac{1}{2}(S_+^4 + S_-^4)$$

$$O_6^0$$

$$= 231S_z^6 - 105\{3S(S+1) - 7\}S_z^4 + \{105S^2(S+1)^2 - 525S(S+1) + 294\}S_z^2 - S^3(S+1)^3 + 40S^2(S+1)^2 - 60S(S+1)$$

$$O_6^4 = \frac{1}{4}\{((11S_z^2 - S(S+1)) - 38)(S_+^4 + S_-^4) + (S_+^4 + S_-^4)(11S_z^2 - S(S+1) - 38)\}$$

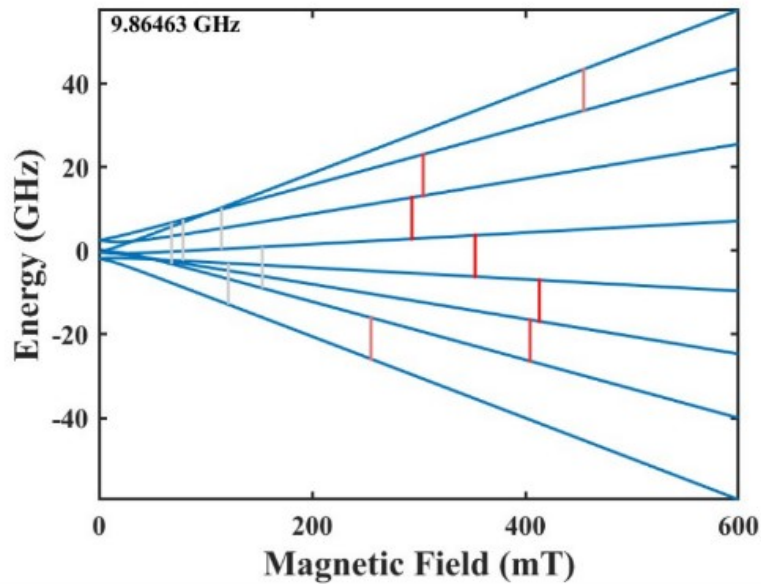

**Supplementary Fig. 1** Calculated energy levels of the Cubic  $\text{Gd}^{3+}$  center in  $\text{CaF}_2$  as a function of the magnetic field for the  $\text{B//c}$  axis. The red line segments indicate the EPR lines from the low field to the high field, which are sequentially caused by the  $M_S = (-7/2 \rightarrow -5/2)$ ,  $M_S = (3/2 \rightarrow 1/2)$ ,  $M_S = (5/2 \rightarrow 3/2)$ ,  $M_S = (1/2 \rightarrow -1/2)$ ,  $M_S = (-5/2 \rightarrow -3/2)$ ,  $M_S = (-3/2 \rightarrow -1/2)$  and  $M_S = (7/2 \rightarrow 5/2)$  transitions are induced. The gray line segment indicates that although the light quantum carrying energy satisfies the resonance condition  $E = h\nu$ , the spin angular momentum carried is not equal to  $+1$ , which cannot make the change in the electron spin magnetic quantum number  $|\Delta M_S| = 1$ , i.e., it does not satisfy the selection rule, and the transitions cannot occur.

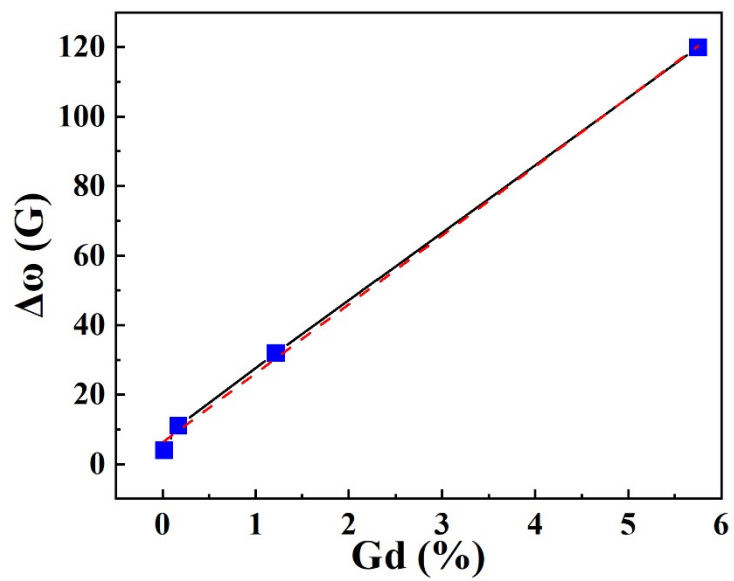

**Supplementary Fig. 2 | Gd doping concentration and peak-to-peak width of the center EPR line. The four points are linearly related,  $R^2 = 0.99873$ .**

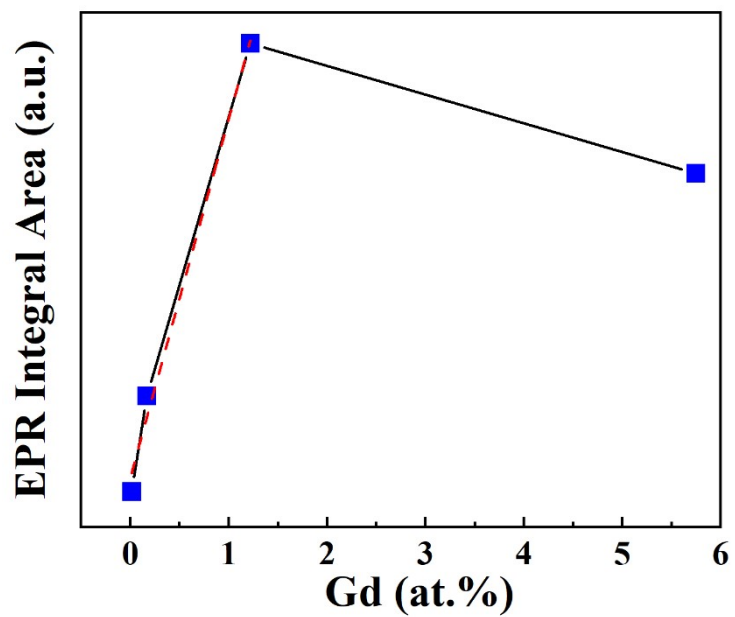

**Supplementary Fig. 3 | Gd doping concentration and EPR integral area.** The first three points were fitted with a linear relationship,  $R^2 = 0.99273$ .



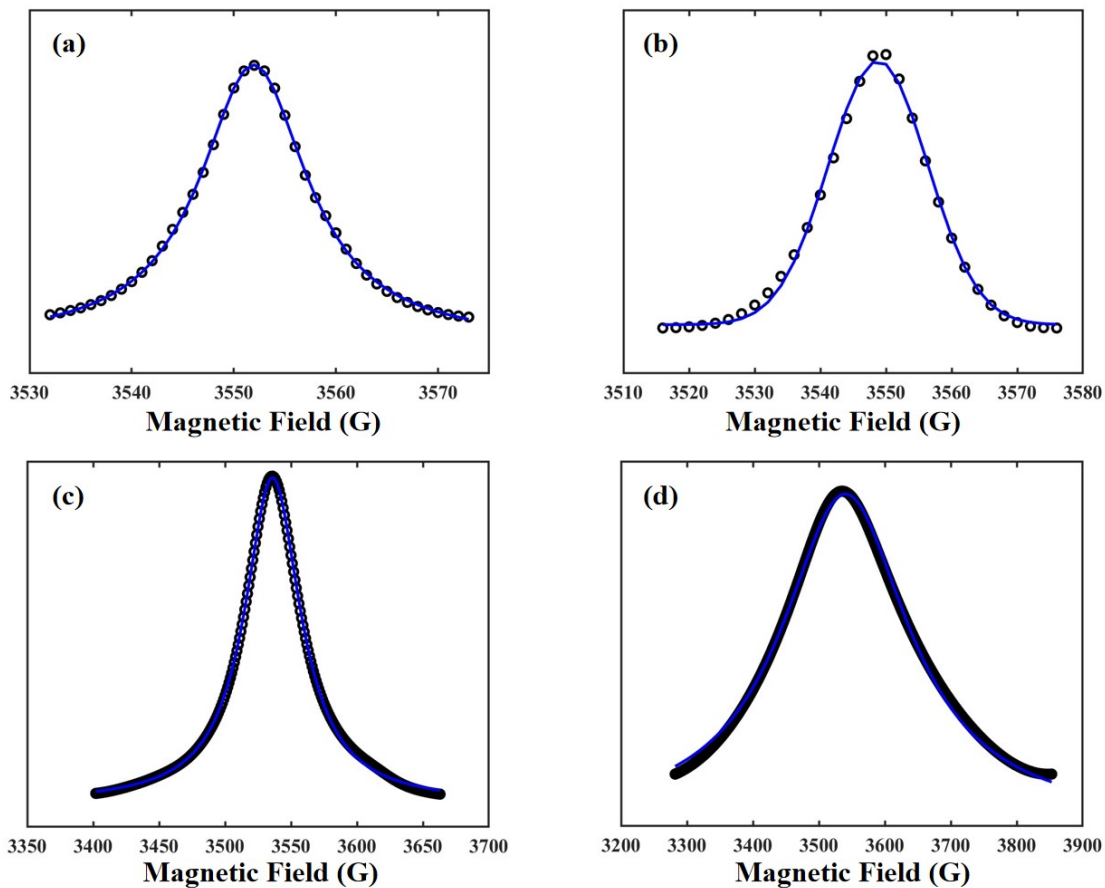

**Supplementary Fig. 4 | Fitting of the center EPR absorption peak. (a)** NCF, Lorentzian,  $R^2 = 0.9995$ ; **(b)** 01GCF, Gaussian,  $R^2 = 0.9970$ ; **(c)** 1GCF, Lorentzian,  $R^2 = 0.9993$ ; **(d)** 5GCF, Lorentzian,  $R^2 = 0.9971$ . The black hollow circles represent the experimental test points, and the blue lines are the fitting results.

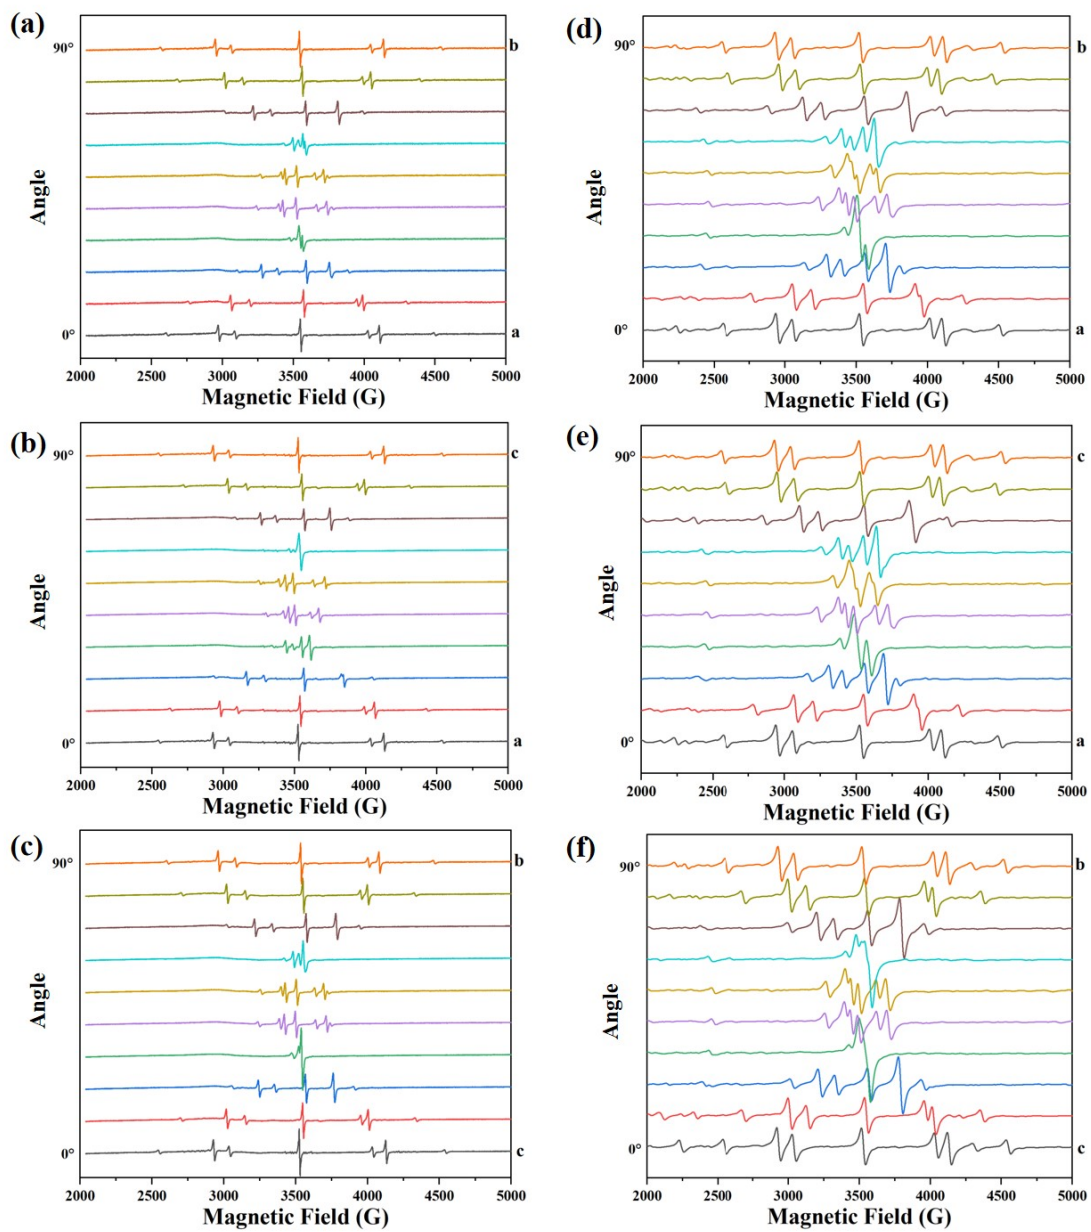

**Supplementary Fig. 5 | Full EPR spectra of NCF and 1GCF.** The magnetic field lying in the (a) a-b plane, (b) a-c plane and (c) b-c plane of NCF, and (d) a-b plane, (e) a-c plane and (f) b-c plane of 1GCF.

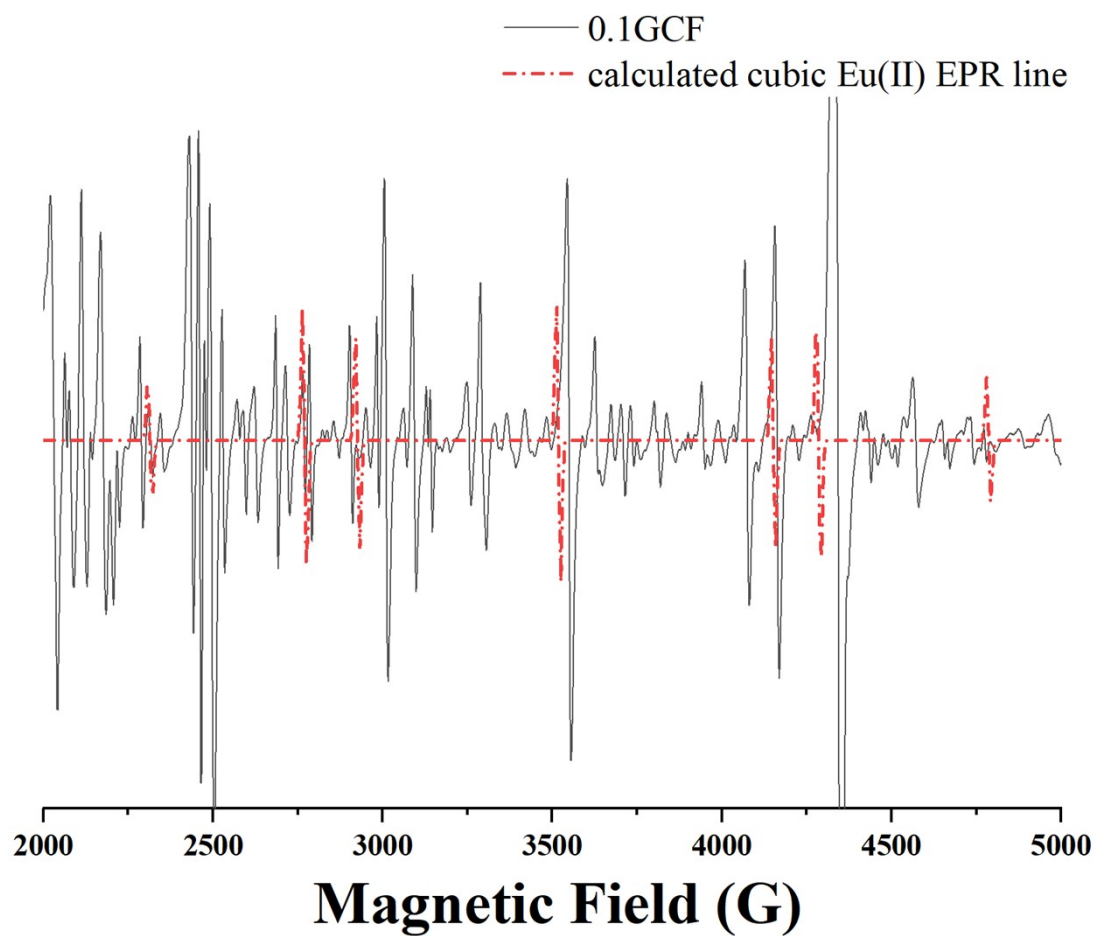

**Supplementary Fig. 6 | EPR spectra of 0.1GCF and calculated cubic Eu(II) EPR line.**

**Supplementary Table 1 | The geometry-optimized coordinates obtained from the calculation. R = 5.44 Å, b-c plane.**

| Angle(degree)     | 0    | 10   | 20   | 30   | 40   | 50   | 60   | 70   | 80   | 90   | 100  | 110  | 120  | 130  | 140  | 150  | 160  | 170  | 180  |
|-------------------|------|------|------|------|------|------|------|------|------|------|------|------|------|------|------|------|------|------|------|
| -7/2>-> -5/2> (G) | 2425 | 2559 | 2912 | 3337 | 3631 | 3632 | 3338 | 2912 | 2559 | 2424 | 2559 | 2912 | 3338 | 3632 | 3631 | 3337 | 2912 | 2559 | 2425 |
|                   | 2664 | 2786 | 3114 | 3515 | 3795 | 3796 | 3516 | 3114 | 2786 | 2663 | 2786 | 3114 | 3516 | 3796 | 3795 | 3515 | 3114 | 2786 | 2664 |
| 1/2>-> 3/2> (G)   | 2825 | 2902 | 3119 | 3406 | 3617 | 3617 | 3406 | 3119 | 2902 | 2825 | 2902 | 3119 | 3406 | 3617 | 3617 | 3406 | 3119 | 2902 | 2825 |
|                   | 3033 | 3105 | 3308 | 3580 | 3782 | 3782 | 3580 | 3308 | 3105 | 3033 | 3105 | 3308 | 3580 | 3782 | 3782 | 3580 | 3308 | 3105 | 3033 |
| 3/2>-> 5/2> (G)   | 2936 | 3032 | 3241 | 3438 | 3547 | 3547 | 3438 | 3241 | 3032 | 2936 | 3032 | 3241 | 3438 | 3547 | 3547 | 3438 | 3241 | 3032 | 2936 |
|                   | 3137 | 3227 | 3423 | 3611 | 3715 | 3715 | 3611 | 3423 | 3227 | 3137 | 3227 | 3423 | 3611 | 3715 | 3715 | 3611 | 3423 | 3227 | 3137 |
| 1/2>-> -1/2> (G)  | 3442 | 3463 | 3486 | 3460 | 3412 | 3412 | 3460 | 3486 | 3463 | 3442 | 3463 | 3486 | 3460 | 3412 | 3412 | 3460 | 3486 | 3463 | 3442 |
|                   | 3614 | 3635 | 3656 | 3632 | 3586 | 3586 | 3632 | 3656 | 3635 | 3614 | 3635 | 3656 | 3632 | 3586 | 3586 | 3632 | 3656 | 3635 | 3614 |
| -5/2>-> -3/2> (G) | 3970 | 3901 | 3716 | 3484 | 3319 | 3319 | 3484 | 3716 | 3901 | 3970 | 3901 | 3716 | 3484 | 3319 | 3319 | 3484 | 3716 | 3901 | 3970 |
|                   | 4120 | 4054 | 3877 | 3654 | 3497 | 3497 | 3654 | 3877 | 4054 | 4120 | 4054 | 3877 | 3654 | 3497 | 3497 | 3654 | 3877 | 4054 | 4120 |
| -3/2>-> -1/2> (G) | 4062 | 3960 | 3723 | 3493 | 3364 | 3364 | 3493 | 3723 | 3960 | 4062 | 3960 | 3723 | 3493 | 3364 | 3364 | 3493 | 3723 | 3960 | 4062 |
|                   | 4209 | 4111 | 3883 | 3663 | 3540 | 3540 | 3663 | 3883 | 4111 | 4209 | 4111 | 3883 | 3663 | 3540 | 3540 | 3663 | 3883 | 4111 | 4209 |
| 5/2>-> 7/2> (G)   | 4486 | 4313 | 3893 | 3451 | 3183 | 3183 | 3451 | 3893 | 4313 | 4486 | 4313 | 3893 | 3451 | 3183 | 3183 | 3451 | 3893 | 4313 | 4486 |
|                   | 4621 | 4452 | 4046 | 3623 | 3369 | 3369 | 3623 | 4046 | 4452 | 4621 | 4452 | 4046 | 3623 | 3369 | 3369 | 3623 | 4046 | 4452 | 4621 |

**Supplementary Table 2 | The geometry-optimized coordinates obtained from the calculation. R = 5.44 Å, a-c plane.**

| Angle(degree)     | 0    | 10   | 20   | 30   | 40   | 50   | 60   | 70   | 80   | 90   | 100  | 110  | 120  | 130  | 140  | 150  | 160  | 170  | 180  |
|-------------------|------|------|------|------|------|------|------|------|------|------|------|------|------|------|------|------|------|------|------|
| -7/2>-> -5/2> (G) | 2425 | 2569 | 2948 | 3403 | 3693 | 3652 | 3316 | 2848 | 2458 | 2307 | 2458 | 2848 | 3316 | 3652 | 3693 | 3403 | 2948 | 2569 | 2425 |
|                   | 2664 | 2776 | 3079 | 3448 | 3732 | 3776 | 3538 | 3181 | 2892 | 2785 | 2892 | 3181 | 3538 | 3776 | 3732 | 3448 | 3079 | 2776 | 2664 |
| 1/2>-> 3/2> (G)   | 2825 | 2911 | 3152 | 3471 | 3679 | 3636 | 3384 | 3058 | 2812 | 2723 | 2812 | 3058 | 3384 | 3636 | 3679 | 3471 | 3152 | 2911 | 2825 |
|                   | 3033 | 3095 | 3275 | 3515 | 3719 | 3762 | 3602 | 3371 | 3198 | 3139 | 3198 | 3371 | 3602 | 3762 | 3719 | 3515 | 3275 | 3095 | 3033 |
| 3/2>-> 5/2> (G)   | 2936 | 3041 | 3272 | 3502 | 3611 | 3567 | 3416 | 3182 | 2945 | 2838 | 2945 | 3182 | 3416 | 3567 | 3611 | 3502 | 3272 | 3041 | 2936 |
|                   | 3137 | 3218 | 3391 | 3545 | 3651 | 3694 | 3632 | 3483 | 3317 | 3238 | 3317 | 3483 | 3632 | 3694 | 3651 | 3545 | 3391 | 3218 | 3137 |
| 1/2>-> -1/2> (G)  | 3442 | 3471 | 3516 | 3524 | 3478 | 3433 | 3439 | 3431 | 3386 | 3357 | 3386 | 3431 | 3439 | 3433 | 3478 | 3524 | 3516 | 3471 | 3442 |
|                   | 3614 | 3627 | 3626 | 3567 | 3519 | 3565 | 3654 | 3712 | 3714 | 3701 | 3714 | 3712 | 3654 | 3565 | 3519 | 3567 | 3626 | 3627 | 3614 |
| -5/2>-> -3/2> (G) | 3970 | 3909 | 3744 | 3548 | 3386 | 3340 | 3463 | 3665 | 3833 | 3896 | 3833 | 3665 | 3463 | 3340 | 3386 | 3548 | 3744 | 3909 | 3970 |
|                   | 4120 | 4048 | 3848 | 3590 | 3429 | 3476 | 3676 | 3929 | 4125 | 4196 | 4125 | 3929 | 3676 | 3476 | 3429 | 3590 | 3848 | 4048 | 4120 |
| -3/2>-> -1/2> (G) | 4062 | 3966 | 3751 | 3556 | 3431 | 3385 | 3472 | 3672 | 3892 | 3989 | 3892 | 3672 | 3472 | 3385 | 3431 | 3556 | 3751 | 3966 | 4062 |
|                   | 4209 | 4104 | 3855 | 3599 | 3472 | 3519 | 3684 | 3936 | 4180 | 4284 | 4180 | 3936 | 3684 | 3519 | 3472 | 3599 | 3855 | 4104 | 4209 |
| 5/2>-> 7/2> (G)   | 4486 | 4320 | 3920 | 3515 | 3253 | 3205 | 3430 | 3844 | 4251 | 4420 | 4251 | 3844 | 3430 | 3205 | 3253 | 3515 | 3920 | 4320 | 4486 |
|                   | 4621 | 4446 | 4019 | 3558 | 3298 | 3346 | 3644 | 4096 | 4516 | 4686 | 4516 | 4096 | 3644 | 3346 | 3298 | 3558 | 4019 | 4446 | 4621 |

**Supplementary Table 3 | The geometry-optimized coordinates obtained from the calculation. R = 7.7 Å, a-c plane.**

| Angle(degree)     | 0    | 10   | 20   | 30   | 40   | 50   | 60   | 70   | 80   | 90   | 100  | 110  | 120  | 130  | 140  | 150  | 160  | 170  | 180  |
|-------------------|------|------|------|------|------|------|------|------|------|------|------|------|------|------|------|------|------|------|------|
| -7/2>-> -5/2> (G) | 2505 | 2637 | 2986 | 3407 | 3703 | 3711 | 3424 | 3003 | 2657 | 2525 | 2657 | 3003 | 3424 | 3711 | 3703 | 3407 | 2986 | 2637 | 2505 |
|                   | 2589 | 2713 | 3044 | 3446 | 3725 | 3718 | 3432 | 3026 | 2693 | 2567 | 2693 | 3026 | 3432 | 3718 | 3725 | 3446 | 3044 | 2713 | 2589 |
| 1/2>-> 3/2> (G)   | 2894 | 2971 | 3187 | 3475 | 3689 | 3696 | 3490 | 3204 | 2989 | 2913 | 2989 | 3204 | 3490 | 3696 | 3689 | 3475 | 3187 | 2971 | 2894 |
|                   | 2968 | 3039 | 3243 | 3513 | 3711 | 3704 | 3498 | 3226 | 3021 | 2949 | 3021 | 3226 | 3498 | 3704 | 3711 | 3513 | 3243 | 3039 | 2968 |
| 3/2>-> 5/2> (G)   | 3003 | 3098 | 3306 | 3506 | 3621 | 3628 | 3521 | 3323 | 3115 | 3020 | 3115 | 3323 | 3521 | 3628 | 3621 | 3506 | 3306 | 3098 | 3003 |
|                   | 3073 | 3164 | 3359 | 3544 | 3643 | 3635 | 3529 | 3343 | 3146 | 3056 | 3146 | 3343 | 3529 | 3635 | 3643 | 3544 | 3359 | 3164 | 3073 |
| 1/2>-> -1/2> (G)  | 3498 | 3521 | 3547 | 3528 | 3488 | 3496 | 3543 | 3562 | 3536 | 3514 | 3536 | 3562 | 3543 | 3496 | 3488 | 3528 | 3547 | 3521 | 3498 |
|                   | 3560 | 3579 | 3597 | 3566 | 3512 | 3504 | 3551 | 3581 | 3564 | 3544 | 3564 | 3581 | 3551 | 3504 | 3512 | 3566 | 3597 | 3579 | 3560 |
| -5/2>-> -3/2> (G) | 4019 | 3954 | 3773 | 3551 | 3397 | 3405 | 3566 | 3788 | 3967 | 4032 | 3967 | 3788 | 3566 | 3405 | 3397 | 3551 | 3773 | 3954 | 4019 |
|                   | 4072 | 4005 | 3821 | 3589 | 3421 | 3413 | 3574 | 3806 | 3992 | 4059 | 3992 | 3806 | 3574 | 3413 | 3421 | 3589 | 3821 | 4005 | 4072 |
| -3/2>-> -1/2> (G) | 4110 | 4011 | 3781 | 3560 | 3441 | 3449 | 3575 | 3795 | 4024 | 4123 | 4024 | 3795 | 3575 | 3449 | 3441 | 3560 | 3781 | 4011 | 4110 |
|                   | 4162 | 4062 | 3828 | 3598 | 3465 | 3457 | 3582 | 3813 | 4048 | 4149 | 4048 | 3813 | 3582 | 3457 | 3465 | 3598 | 3828 | 4062 | 4162 |
| 5/2>-> 7/2> (G)   | 4531 | 4360 | 3948 | 3519 | 3265 | 3273 | 3534 | 3961 | 4372 | 4542 | 4372 | 3961 | 3534 | 3273 | 3265 | 3519 | 3948 | 4360 | 4531 |
|                   | 4578 | 4406 | 3993 | 3557 | 3290 | 3281 | 3542 | 3979 | 4394 | 4565 | 4394 | 3979 | 3542 | 3281 | 3290 | 3557 | 3993 | 4406 | 4578 |

**Supplementary Table 3 | The geometry-optimized coordinates obtained from the calculation. R = 7.7 Å, a-b plane.**

| Angle(degree)     | 0    | 10   | 20   | 30   | 40   | 50   | 60   | 70   | 80   | 90   | 100  | 110  | 120  | 130  | 140  | 150  | 160  | 170  | 180  |
|-------------------|------|------|------|------|------|------|------|------|------|------|------|------|------|------|------|------|------|------|------|
| -7/2>-> -5/2> (G) | 2525 | 2655 | 2997 | 3411 | 3700 | 3700 | 3412 | 2997 | 2655 | 2525 | 2655 | 2997 | 3412 | 3700 | 3700 | 3411 | 2997 | 2655 | 2525 |
|                   | 2567 | 2695 | 3033 | 3443 | 3729 | 3730 | 3443 | 3033 | 2695 | 2567 | 2695 | 3033 | 3443 | 3730 | 3729 | 3443 | 3033 | 2695 | 2567 |
| 1/2>-> 3/2> (G)   | 2913 | 2987 | 3198 | 3478 | 3685 | 3685 | 3478 | 3198 | 2987 | 2913 | 2987 | 3198 | 3478 | 3685 | 3685 | 3478 | 3198 | 2987 | 2913 |
|                   | 2949 | 3023 | 3232 | 3510 | 3715 | 3715 | 3510 | 3232 | 3023 | 2949 | 3023 | 3232 | 3510 | 3715 | 3715 | 3510 | 3232 | 3023 | 2949 |
| 3/2>-> 5/2> (G)   | 3020 | 3114 | 3317 | 3510 | 3617 | 3617 | 3510 | 3317 | 3114 | 3020 | 3114 | 3317 | 3510 | 3617 | 3617 | 3510 | 3317 | 3114 | 3020 |
|                   | 3056 | 3148 | 3349 | 3540 | 3647 | 3647 | 3540 | 3349 | 3148 | 3056 | 3148 | 3349 | 3540 | 3647 | 3647 | 3540 | 3349 | 3148 | 3056 |
| 1/2>-> -1/2> (G)  | 3514 | 3535 | 3557 | 3532 | 3484 | 3484 | 3532 | 3557 | 3535 | 3514 | 3535 | 3557 | 3532 | 3484 | 3484 | 3532 | 3557 | 3535 | 3514 |
|                   | 3544 | 3565 | 3587 | 3562 | 3515 | 3515 | 3562 | 3587 | 3565 | 3544 | 3565 | 3587 | 3562 | 3515 | 3515 | 3562 | 3587 | 3565 | 3544 |
| -5/2>-> -3/2> (G) | 4032 | 3966 | 3783 | 3555 | 3393 | 3393 | 3555 | 3783 | 3966 | 4032 | 3966 | 3783 | 3555 | 3393 | 3393 | 3555 | 3783 | 3966 | 4032 |
|                   | 4059 | 3993 | 3811 | 3585 | 3425 | 3425 | 3585 | 3811 | 3993 | 4059 | 3993 | 3811 | 3585 | 3425 | 3425 | 3585 | 3811 | 3993 | 4059 |
| -3/2>-> -1/2> (G) | 4123 | 4022 | 3790 | 3564 | 3437 | 3437 | 3564 | 3790 | 4022 | 4123 | 4022 | 3790 | 3564 | 3437 | 3437 | 3564 | 3790 | 4022 | 4123 |
|                   | 4149 | 4049 | 3818 | 3594 | 3468 | 3468 | 3594 | 3818 | 4049 | 4149 | 4049 | 3818 | 3594 | 3468 | 3468 | 3594 | 3818 | 4049 | 4149 |
| 5/2>-> 7/2> (G)   | 4542 | 4371 | 3957 | 3523 | 3261 | 3261 | 3523 | 3957 | 4371 | 4542 | 4371 | 3957 | 3523 | 3261 | 3261 | 3523 | 3957 | 4371 | 4542 |
|                   | 4565 | 4396 | 3983 | 3553 | 3293 | 3293 | 3553 | 3983 | 4396 | 4565 | 4396 | 3983 | 3553 | 3293 | 3293 | 3553 | 3983 | 4396 | 4565 |
